# Supplementary material for: Evaluation of a novel real-time PCR assay for the detection, identification and quantification of Plasmodium species causing malaria in humans
Source: Springer Nature journal article supplement (doi:10.1186/s12936-021-03842-8), 2021-07-12

*P. ovale curtisi*

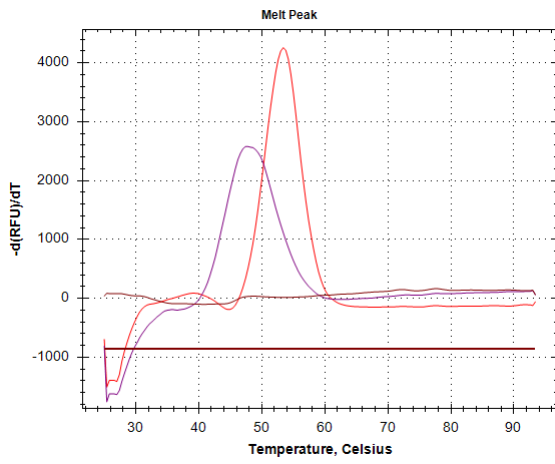

*P. ovale wallikeri*

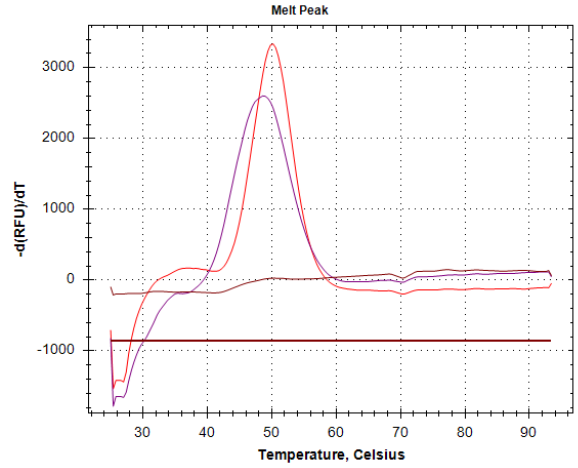

*P. malariae*

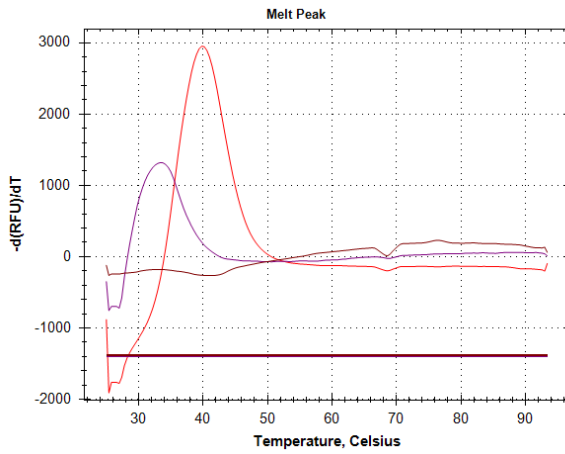

*P. knowlesi* LT48

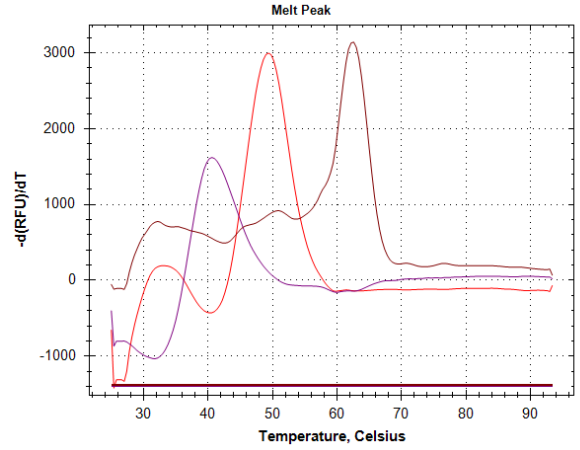

*P. knowlesi* ATCC 30153

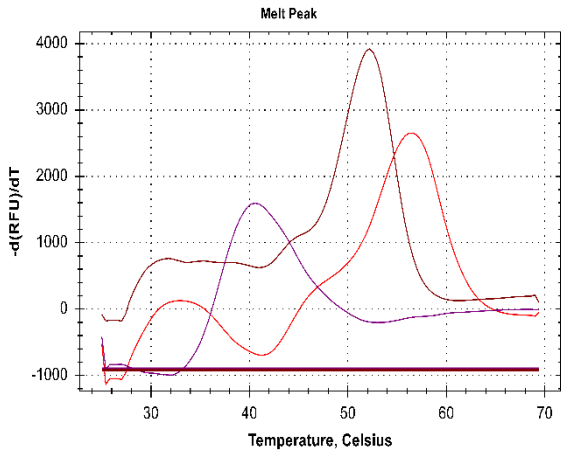

*P. knowlesi* ATCC 30158

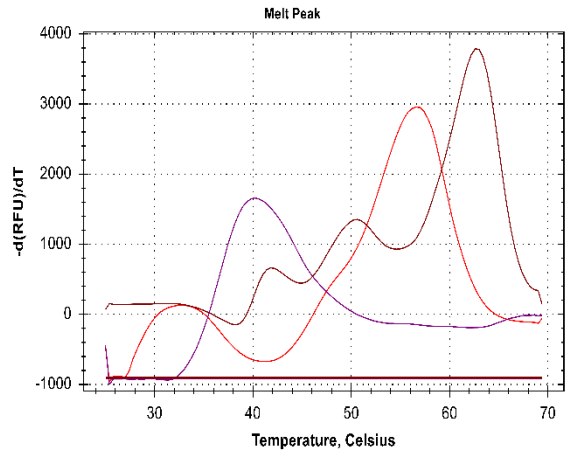

*P. cynomolgi* KJ 569868.1

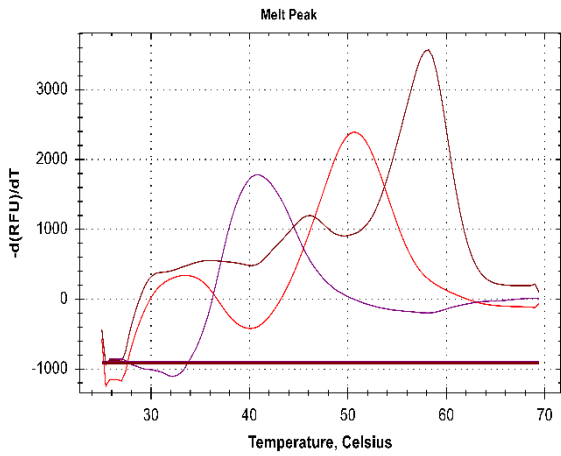

*P. cynomolgi* KJ 569866.1

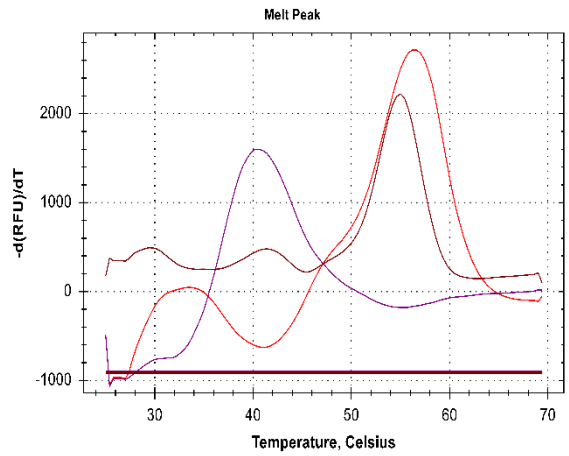

*P. cynomolgi* ATCC 30149

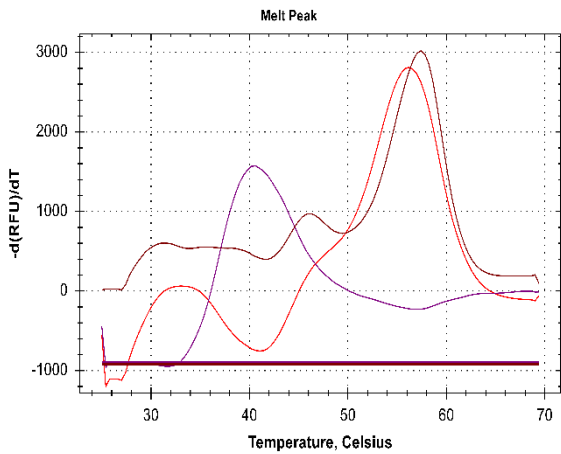

Supplement: MOESM1 [file 19354034]
