# Supplementary material for: Evaluation of a novel real-time PCR assay for the detection, identification and quantification of Plasmodium species causing malaria in humans
Source: Springer Nature journal article supplement (doi:10.1186/s12936-021-03842-8), 2021-07-12

*P. falciparum* + *P. vivax*

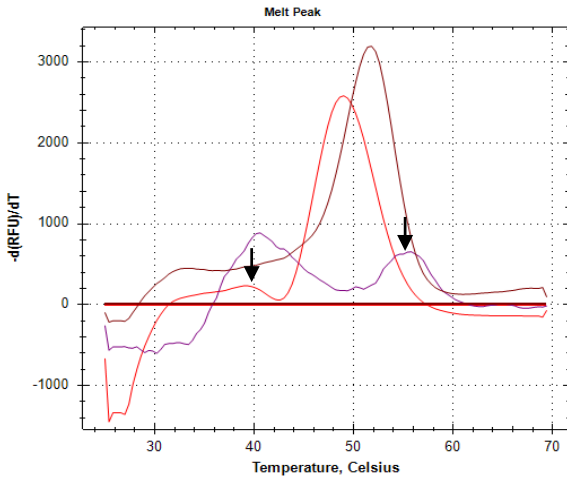

*P. falciparum* + *P. malariae*

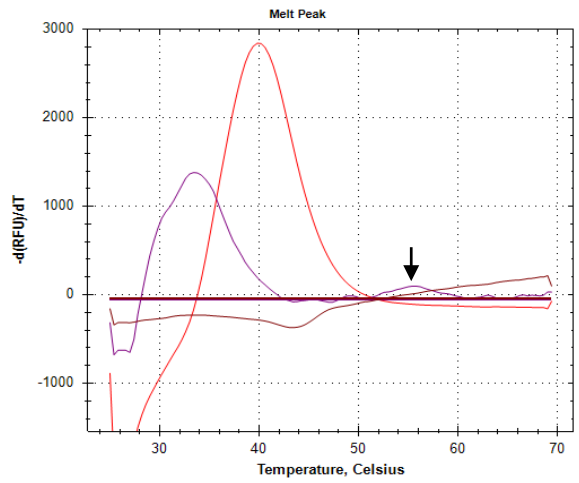

*P. falciparum* + *P. ovale wallikeri*

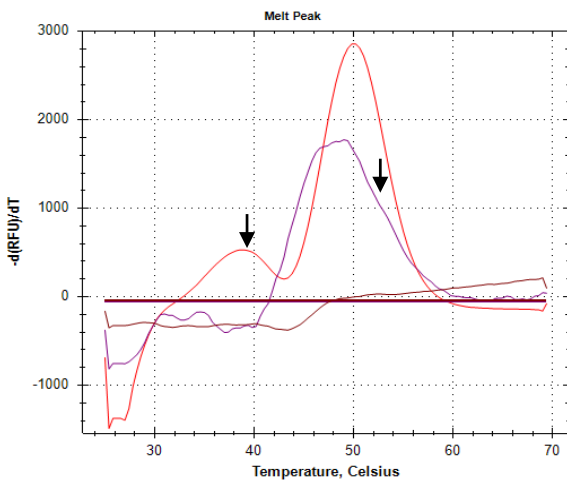

*P. falciparum* + *P. ovale curtisi*

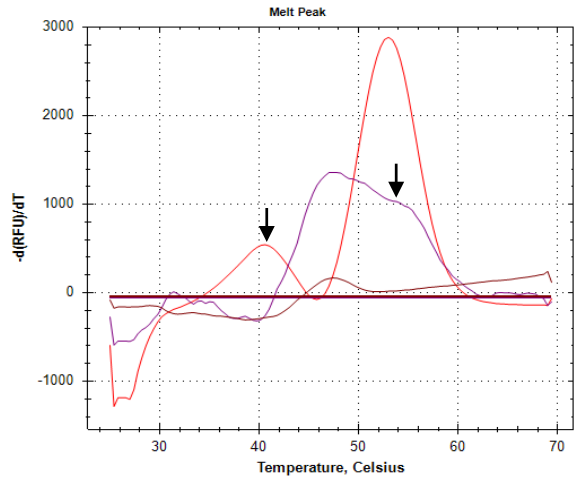

*P. falciparum* + *P. knowlesi* ATCC 30158

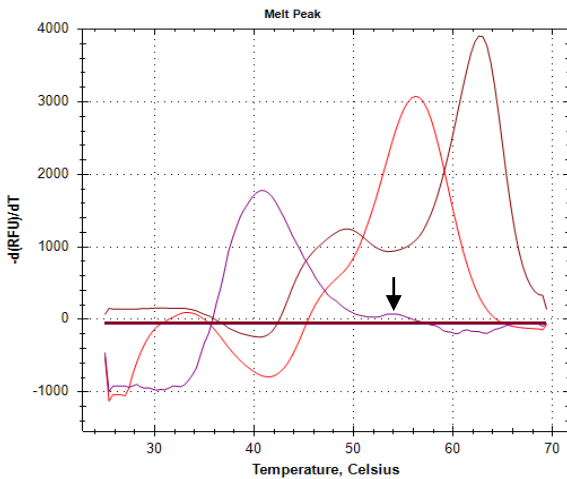

*P. falciparum* + *P. cynomolgi* KJ569868.1

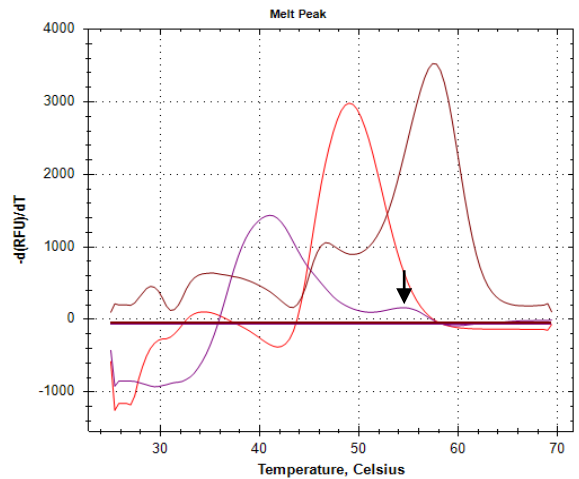

Supplement: MOESM2 [file 19354034]
